# Supplementary material for: Upgrading biochar via co-pyrolyzation of agricultural biomass and polyethylene terephthalate wastes
Source: Royal Society of Chemistry journal article supplement (doi:10.1039/c9ra05518e), 2019-01-01
Supplement: c9ra05518e1.pdf [file c9ra05518e1.pdf]

Title: Upgrading biochar via co-disposal of agricultural biomass and PETE wastes

Authors: Seok-Young Oh\* and Tae-Cheol Seo

Department of Civil and Environmental Engineering, University of Ulsan, Ulsan 44610, South  
Korea

Supplementary Information

Number of pages: 7 (including a cover page)

Number of tables: 2

Number of figures: 5

Table S1. Identified compounds released from PETE/RS (20:80 v/v)-derived biochar via gas chromatography-mass spectrometry analysis.

| Compound name                              | Chemical formula                              | Molecular weight | Similarity index (%) |
|--------------------------------------------|-----------------------------------------------|------------------|----------------------|
| 2-Propanone                                | C <sub>3</sub> H <sub>6</sub> O               | 58               | 91                   |
| 2-Propanol                                 | C <sub>3</sub> H <sub>8</sub> O               | 60               | 83                   |
| 2-Pentene                                  | C <sub>5</sub> H <sub>10</sub>                | 70               | 86                   |
| 2-Methyl-1-butene                          | C <sub>5</sub> H <sub>10</sub>                | 70               | 85                   |
| Propanoic acid, 2-hydroxy, ethyl ester     | C <sub>5</sub> H <sub>10</sub> O <sub>3</sub> | 118              | 83                   |
| Diacetone alcohol                          | C <sub>6</sub> H <sub>12</sub> O <sub>2</sub> | 116              | 88                   |
| Hexanoic acid, 2-methyl-3-oxo, ethyl ester | C <sub>9</sub> H <sub>16</sub> O <sub>3</sub> | 172              | 83                   |

Table S2. Calculated isotherm parameters of Langmuir models for sorption of DNT, DCP, Pb, chromate, and selenate onto PETE/RS-derived biochar.

| Contaminants | Types of biochar         | Q (mg/g) | K <sub>L</sub> (L/mg) | R <sup>2</sup> |
|--------------|--------------------------|----------|-----------------------|----------------|
| DNT          | RS 550 °C                | 5.13     | 2.46                  | 0.94           |
|              | RS+PETE (9:1 v/v) 550 °C | 9.51     | 0.10                  | 0.94           |
|              | RS+PETE (8:2 v/v) 550 °C | 10.2     | 0.09                  | 0.92           |
|              | RS 900 °C                | 19.2     | 0.39                  | 0.93           |
|              | RS+PETE (9:1 v/v) 900 °C | 10.6     | 0.39                  | 0.95           |
|              | RS+PETE (8:2 v/v) 90 °C  | 11.7     | 0.52                  | 0.92           |
| DCP          | RS 550 °C                | 11.5     | 0.02                  | 0.91           |
|              | RS+PETE (9:1 v/v) 550 °C | 12.3     | 0.01                  | 0.94           |
|              | RS+PETE (8:2 v/v) 550 °C | 12.5     | 0.01                  | 0.93           |
|              | RS 900 °C                | 16.4     | 0.02                  | 0.91           |
|              | RS+PETE (9:1 v/v) 900 °C | 19.1     | 0.02                  | 0.90           |
|              | RS+PETE (8:2 v/v) 90 °C  | 20.2     | 0.01                  | 0.94           |
| Pb           | RS 550 °C                | 95.0     | 0.23                  | 0.96           |
|              | RS+PETE (9:1 v/v) 550 °C | 111      | 0.37                  | 0.96           |
|              | RS+PETE (8:2 v/v) 550 °C | 115      | 5.24                  | 0.98           |
|              | RS 900 °C                | 90.1     | 0.13                  | 0.94           |
|              | RS+PETE (9:1 v/v) 900 °C | 115      | 4.65                  | 0.98           |
|              | RS+PETE (8:2 v/v) 90 °C  | 118      | 5.77                  | 0.99           |
| Chromate     | RS 550 °C                | 1.20     | 0.00                  | 0.84           |
|              | RS+PETE (9:1 v/v) 550 °C | 5.51     | 0.05                  | 0.91           |
|              | RS+PETE (8:2 v/v) 550 °C | 5.82     | 0.04                  | 0.92           |
|              | RS 900 °C                | 4.93     | 0.02                  | 0.91           |
|              | RS+PETE (9:1 v/v) 900 °C | 5.91     | 0.01                  | 0.91           |
|              | RS+PETE (8:2 v/v) 90 °C  | 6.10     | 0.01                  | 0.93           |
| Selenate     | RS 550 °C                | 12.0     | 0.01                  | 0.93           |
|              | RS+PETE (9:1 v/v) 550 °C | 4.52     | 0.01                  | 0.94           |
|              | RS+PETE (8:2 v/v) 550 °C | 4.23     | 0.01                  | 0.93           |
|              | RS 900 °C                | 0.98     | 0.00                  | 0.92           |
|              | RS+PETE (9:1 v/v) 900 °C | 2.02     | 0.01                  | 0.91           |
|              | RS+PETE (8:2 v/v) 90 °C  | 2.88     | 0.01                  | 0.91           |

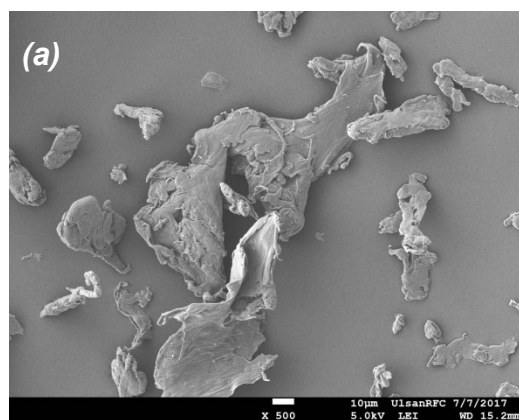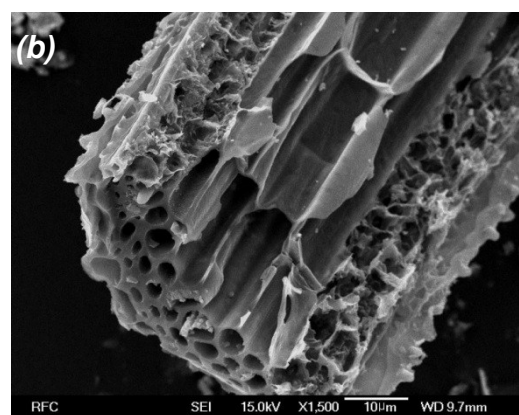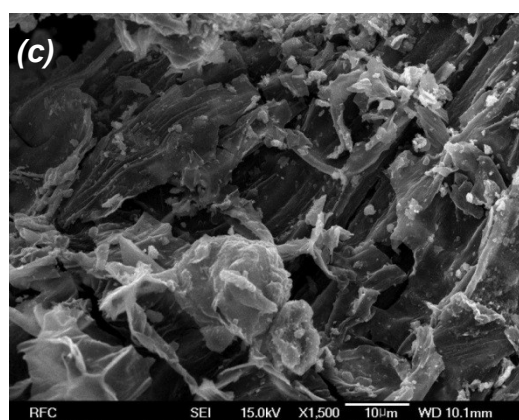

Fig. S1. Scanning electron microscopy images of (a) ground PETE, (b) RS biochar, and (c) PETE/RS (20:80 v/v)-derived biochar pyrolyzed at 550 °C.

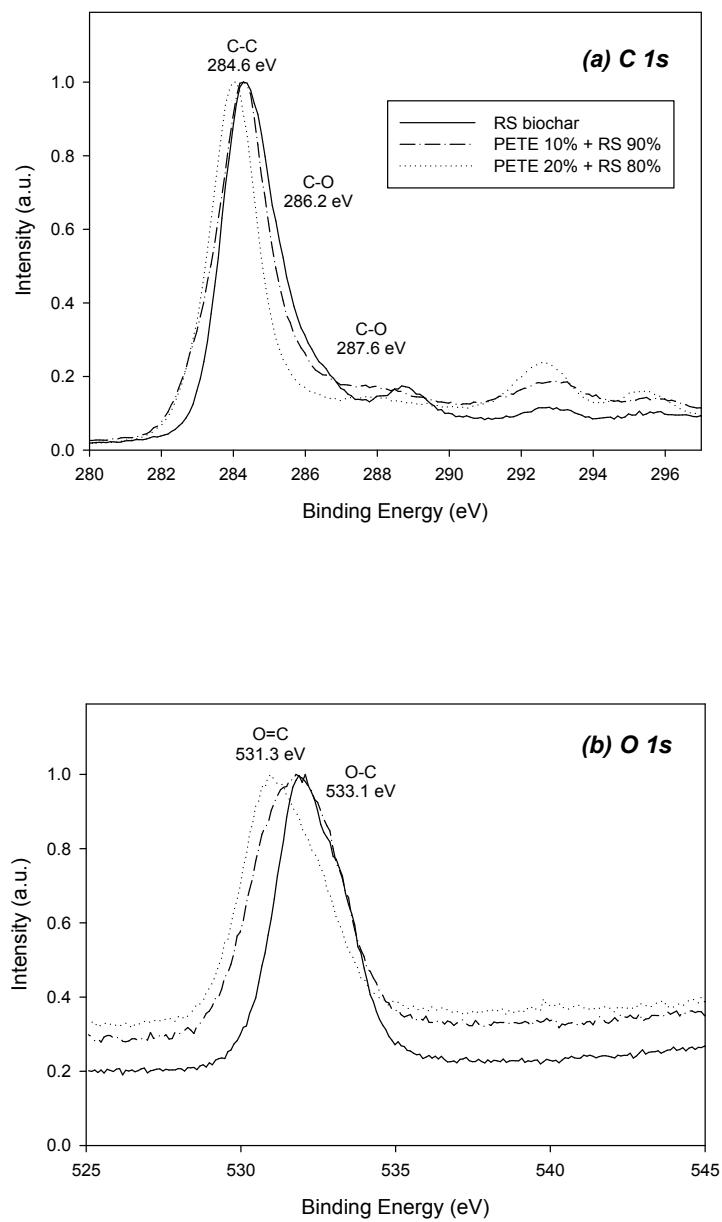

Fig. S2. X-ray photoelectron spectroscopy spectra of PETE/RS-derived biochars pyrolyzed at 550 °C; (a) C 1s and (b) O 1s.

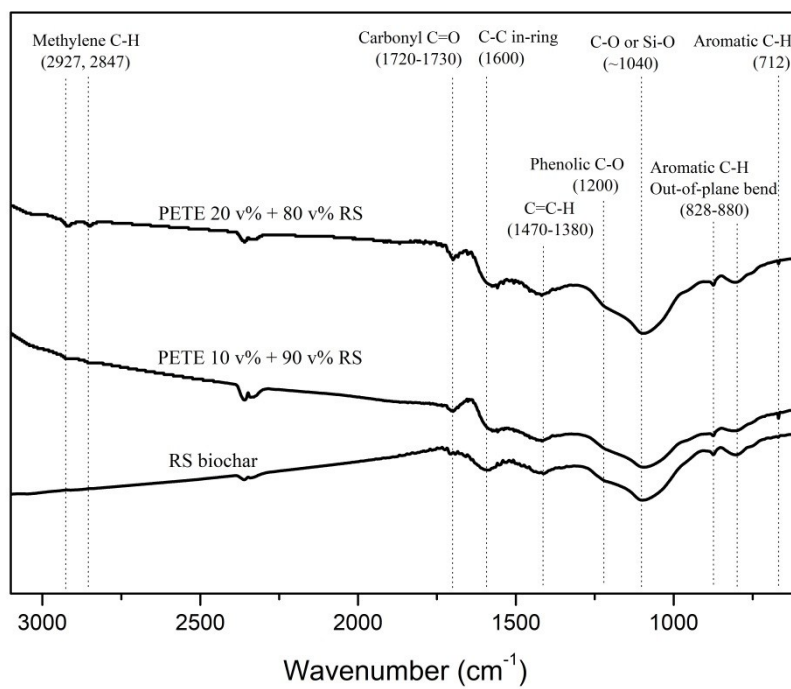

Fig. S3. FT-IR spectra of PETE/RS-derived biochars pyrolyzed at 550 °C.

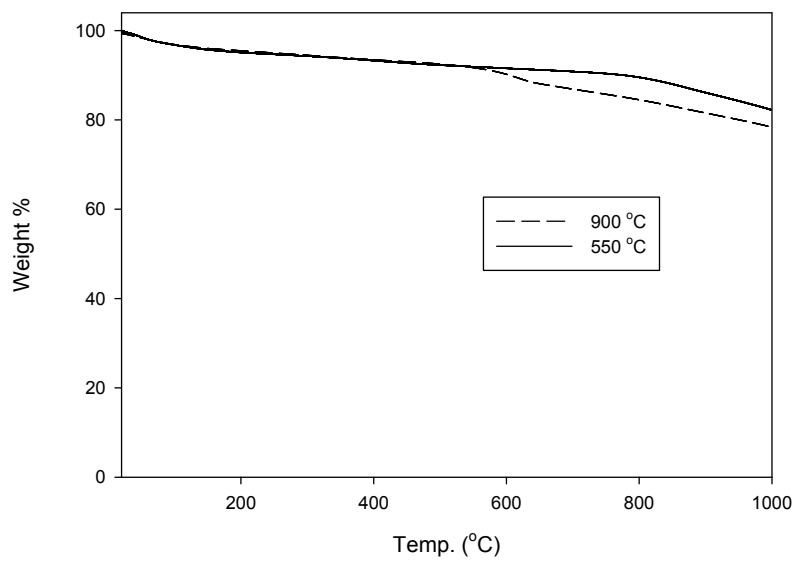

Fig. S4. Thermogravimetric analysis (TGA) curves of PETE/RS (80:20 v/v)-derived biochars.

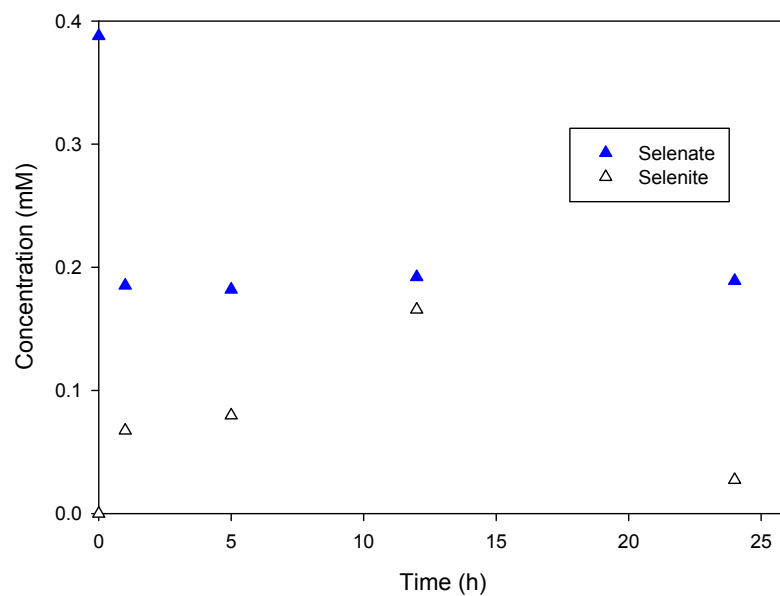

Fig. S5. Concentrations of selenate and selenite in the presence of PETE/RS (20/80 v/v)-derived biochar at pH 7.4 (0.1 M HEPES buffer).
